# Supplementary material
Source: Springer Nature journal article supplement (https://www.springermedizin.de/resource/supplementary/12958_2003_59_MOESM6_ESM.pdf/9566282)

**A)**

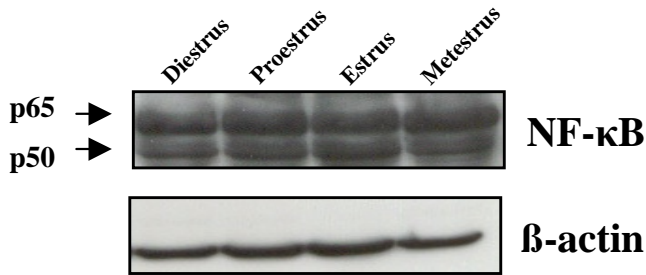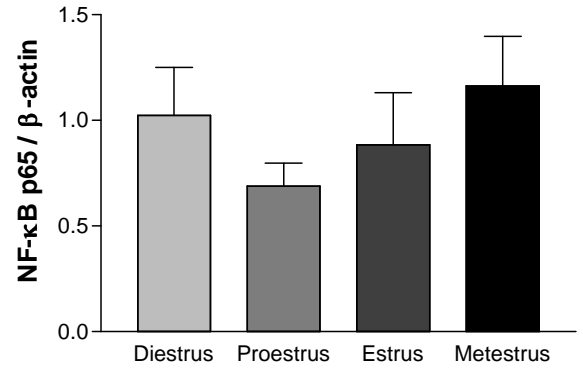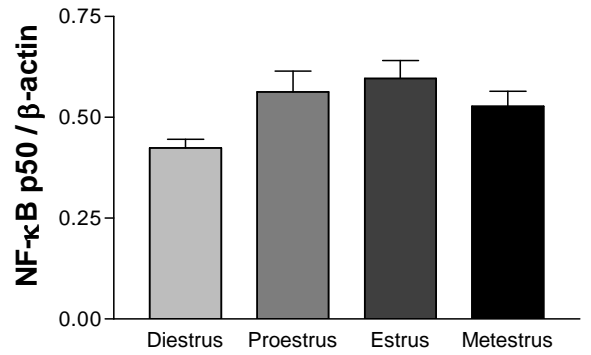

**B)**

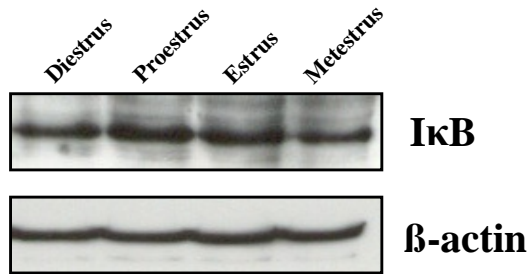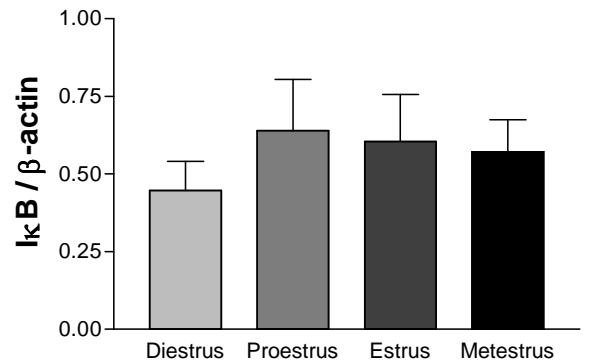

**C)**

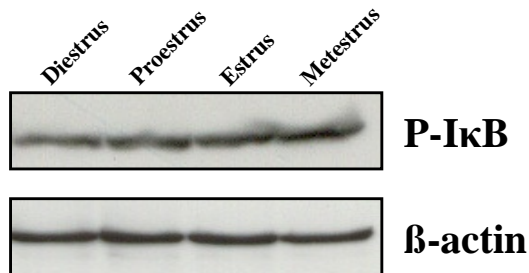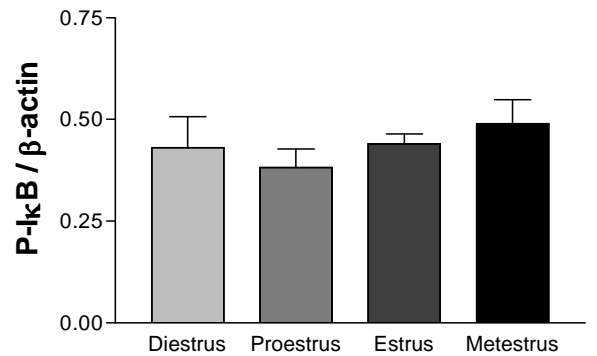

Supplement: MOESM6 [file 9566282]
